# Supplementary material
Source: PubMed Central journal article supplement (PMC4340766)
Supplement: NIHMS652867-supplement-1.pdf [file NIHMS652867-supplement-1.pdf]

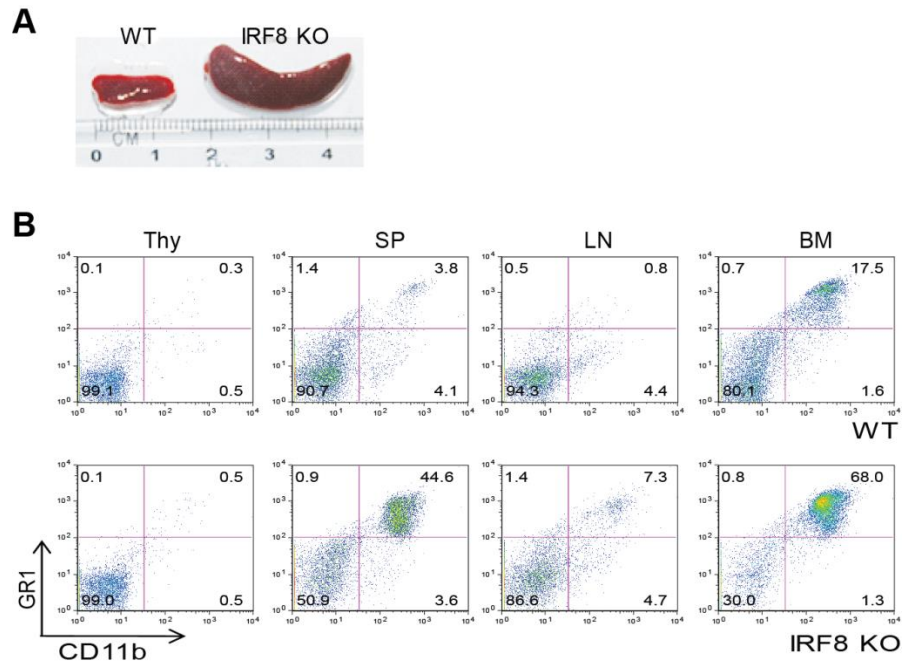

**Supplemental Figure 1. Mice with a null mutation of *irf8* exhibit accumulation of CD11b<sup>+</sup>Gr1<sup>+</sup> MDSCs.** **A.** Spleen morphology of wt and IRF8 KO mice (3 months of age). Shown are representative images from one pair of wt and IRF8 KO mice of three pairs of mice. **B.** CD11b<sup>+</sup>Gr1<sup>+</sup> MDSC profiles in thymus, spleen, lymph nodes and bone marrow. Cells were collected from the indicated tissues, and stained with CD11b- and Gr1-specific mAbs. Isotype control mAbs were used as negative controls. Shown are representative results from one pair of mice of three pairs of wt and IRF8 KO mice.

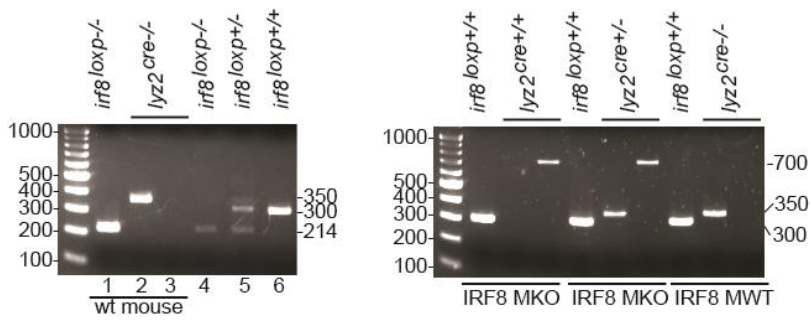

**Supplemental Figure 2. Genotypes of wt and IRF8 MKO mice.** PCR banding patterns of mice with the indicated genotypes. PCR primer sequences and genotyping protocols are according to the Jackson Laboratory.

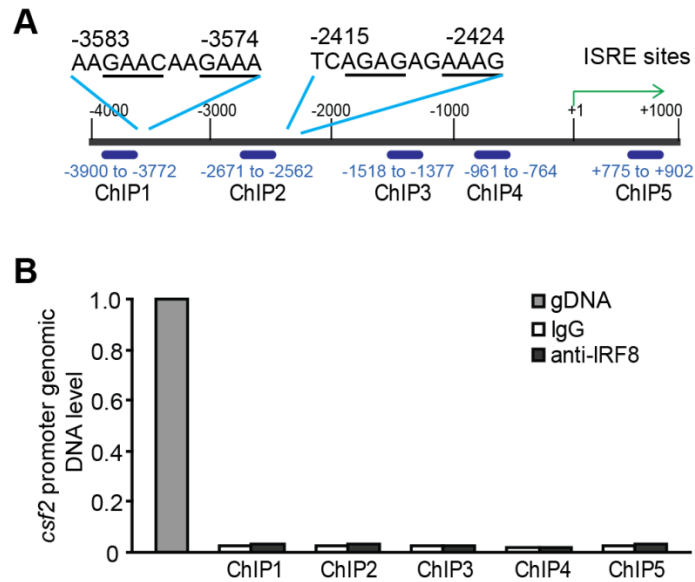

**Supplemental Figure 3. A.** The mouse GM-CSF gene (*csf2*) promoter structure showing the region of -4000 to +1000 relative to the transcription initiation site (black bar). The putative ISRE consensus sequences and locations are indicated at the top of the bar. The PCR-amplified genomic DNA regions for each of the five ChIP PCR primer pairs are indicated (short blue bars). **B.** CD4<sup>+</sup> T cells were isolated by negative selection. The cells were stimulated with anti-CD3 and anti-CD28 mAbs for 3 days and analyzed by chromatin immunoprecipitation (ChIP) using goat IgG or anti-IRF8 antibody (C-19, Santa Cruz). The immunoprecipitated genomic DNA was analyzed by real-time PCR using the mouse genomic DNA (gDNA, 2ng) as a positive control. Shown are representative results from one of four independent experiments.

**Supplemental Table 1: PCR Primer Sequences**

| Gene           | Use       |         | Sequence                        |
|----------------|-----------|---------|---------------------------------|
| IP-1 $\alpha$  | RT-PCR    | Forward | 5'-GCTGTTTGCTGCCAAGTAGCC-3'     |
|                |           | Reverse | 5'-TGACCAACTGGGAGGGAGATGG-3'    |
| IP10           | RT-PCR    | Forward | 5'-TCTCTCCATCACTCCCCTTTACC-3'   |
|                |           | Reverse | 5'-CTTGCTTCGGCAGTTACTTTTGTC-3'  |
| iNOS           | RT-PCR    | Forward | 5'-TTGGGGAGACAGCGAAATGC-3'      |
|                |           | Reverse | 5'-GGAGTGGAGAAGAAGGGAGGAAAG-3'  |
| IL12p40        | RT-PCR    | Forward | 5'-GAGACCCTGCCCATTGAACTG-3'     |
|                |           | Reverse | 5'-GGAACGCACCTTTCTGGTTACAC-3'   |
| IRF8           | RT-PCR    | Forward | 5'-CGTGGAAAGACGAGGTTACGCTG-3'   |
|                |           | Reverse | 5'-GCTGAATGGTGTGTGTCATAGGC-3'   |
| IRF8mt         | RT-PCR    | Forward | 5'-GCGCGGGCAGCGTGGGAACCGGCG-3'  |
|                |           | Reverse | 5'-GTCACTTCTTCAAATCTGGGCTC-3'   |
| GM-CSF         | ChIP1 PCR | Forward | 5'-CTTCTCCCCTCATTCTCCTTTG-3'    |
|                |           | Reverse | 5'-TGCCCCAAGCCTTATCTCCAAC-3'    |
| GM-CSF         | ChIP2 PCR | Forward | 5'-GCTCTTCTGCCAGGTTAGGACTTC-3   |
|                |           | Reverse | 5'-GATGGATGCTGTATCTGTTGTTGG-3   |
| GM-CSF         | ChIP3 PCR | Forward | 5'-CCCTCACTTCTGTCTGGTTTCATC-3'  |
|                |           | Reverse | 5'-CACTTGTTTTGCCTGCTTTGTG-3'    |
| GM-CSF         | ChIP4 PCR | Forward | 5'-TGTGTGCGTGCCCTGGTTATTG-3'    |
|                |           | Reverse | 5'-TTGACTGCTGATTCTGCCCTCC-3     |
| GM-CSF         | ChIP5 PCR | Forward | 5'-GCTTTTCAAATAGTGCTTCCCCAC-3   |
|                |           | Reverse | 5'-TTCCCAGTTCCAAGTGCTGTCC-3     |
| GM-CSF         | RT-PCR    | Forward | 5'- AAACACAAGTTACCACCTATGCGG -3 |
|                |           | Reverse | 5'- TCCAAGTTCCTGGCTCATTACG -3   |
| $\beta$ -Actin | RT-PCR    | Forward | 5'-CTGGCACCACCTTCTACAATG-3'     |
|                |           | Reverse | 5'-GGGTCATCTTTTCACGGTTGG-3'     |
